# Supplementary material
Source: PubMed Central journal article supplement (PMC2556515)
Supplement: NIHMS61277-supplement-si20060706_013.pdf [file NIHMS61277-supplement-si20060706_013.pdf]

Table 1. Force Field Parameters Developed For Creatine.

| <b>Atom Name</b> | <b>X</b> | <b>Y</b> | <b>Z</b> | <b>Atom Type</b> | <b>Atomic Charge</b> |
|------------------|----------|----------|----------|------------------|----------------------|
| NA               | 2.686    | 0.285    | 0.437    | na               | -0.7483              |
| CA               | 1.599    | 0.329    | 0.031    | c2               | 0.5405               |
| NB               | 1.603    | 1.675    | 0.018    | na               | -0.7483              |
| NC               | 0.563    | 0.362    | 0.477    | na               | -0.1644              |
| CB               | 0.557    | 1.825    | 0.397    | c3               | -0.3069              |
| CC               | 0.811    | 0.348    | 0.719    | c3               | 0.0076               |
| CD               | 2.003    | 0.128    | 0.185    | c                | 0.6312               |
| O1               | 1.812    | 0.262    | 1.369    | o                | -0.6487              |
| O2               | 3.136    | 0.356    | 0.302    | o                | -0.6487              |
| H1               | 0.317    | 2.407    | 0.772    | h1               | 0.1437               |
| H2               | 1.475    | 2.207    | 0.901    | h1               | 0.1437               |
| H3               | 0.744    | 2.118    | 0.663    | h1               | 0.1437               |
| H4               | 2.683    | 1.388    | 0.426    | hn               | 0.3978               |
| H5               | 3.551    | 0.291    | 0.808    | hn               | 0.3978               |
| H6               | 0.704    | 2.183    | 0.405    | hn               | 0.3978               |
| H7               | 2.468    | 2.251    | 0.353    | h1               | 0.3978               |
| H8               | -0.620   | 1.446    | 0.767    | h1               | 0.0318               |
| H9               | -1.130   | -0.120   | 1.763    | h1               | 0.0318               |

FIGURE 1: Snapshots of creatine kinase sampled during the MD simulations are shown as colored ribbon diagrams (red: Cys283-anion; blue: Cys283-neutral). These are superimposed on the crystal conformation of CK-TSAC (gray). The TSAC is shown in licorice. The time at which the snapshots were taken accompany the figures.

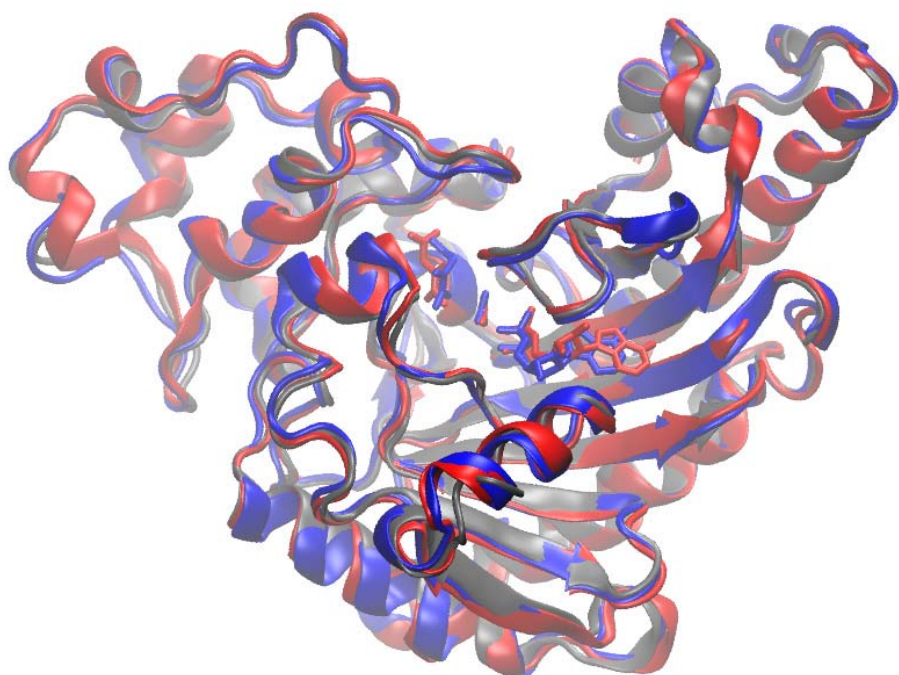

2ns

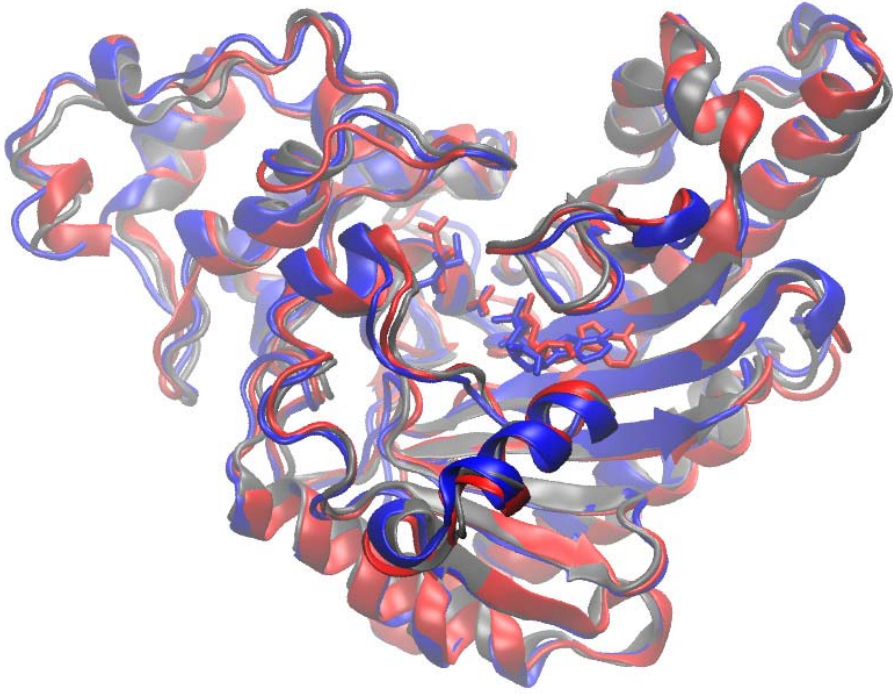

4ns

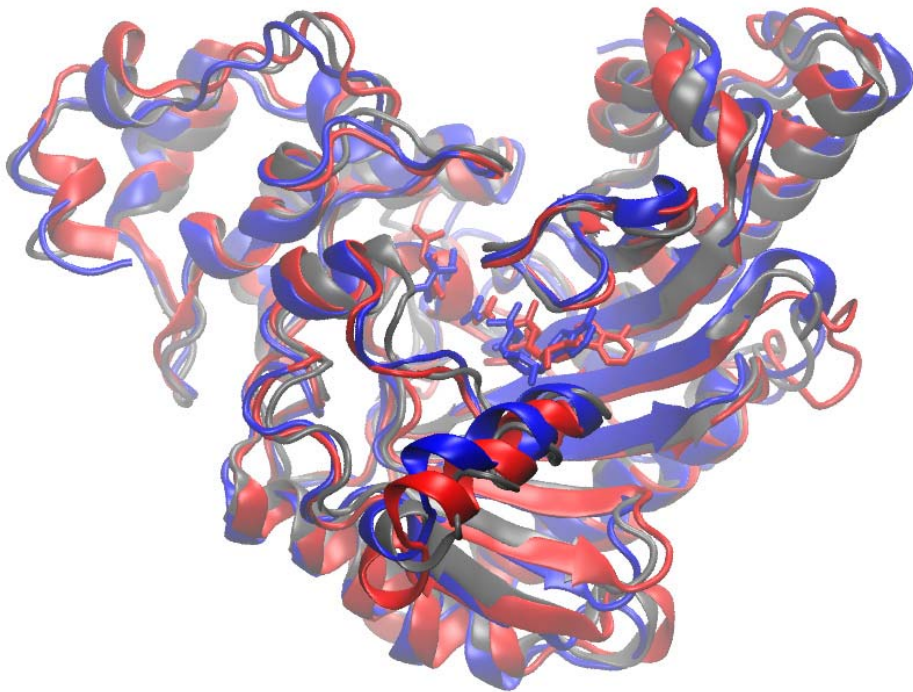

6ns

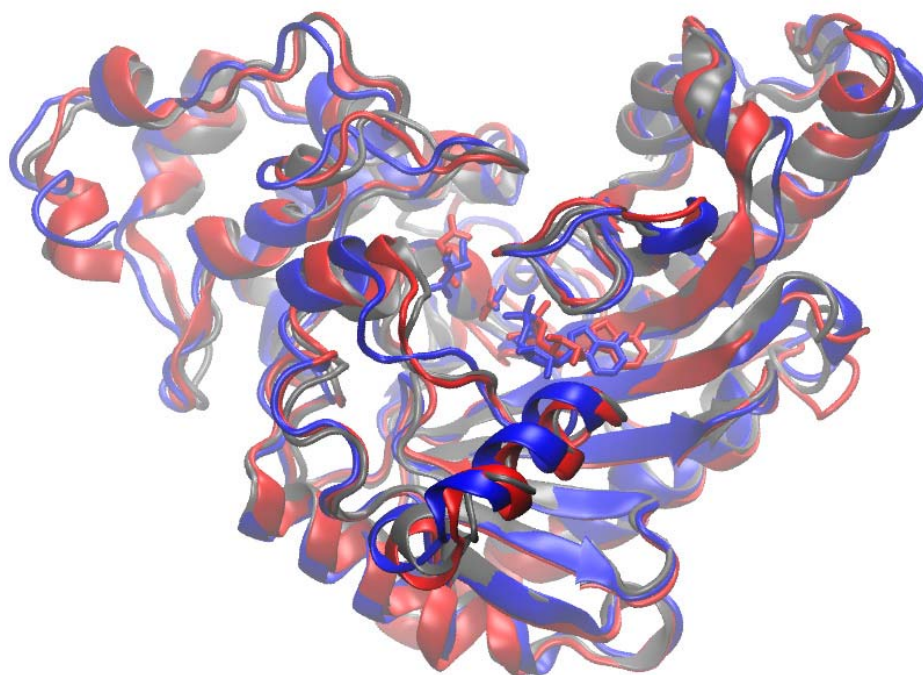

8ns

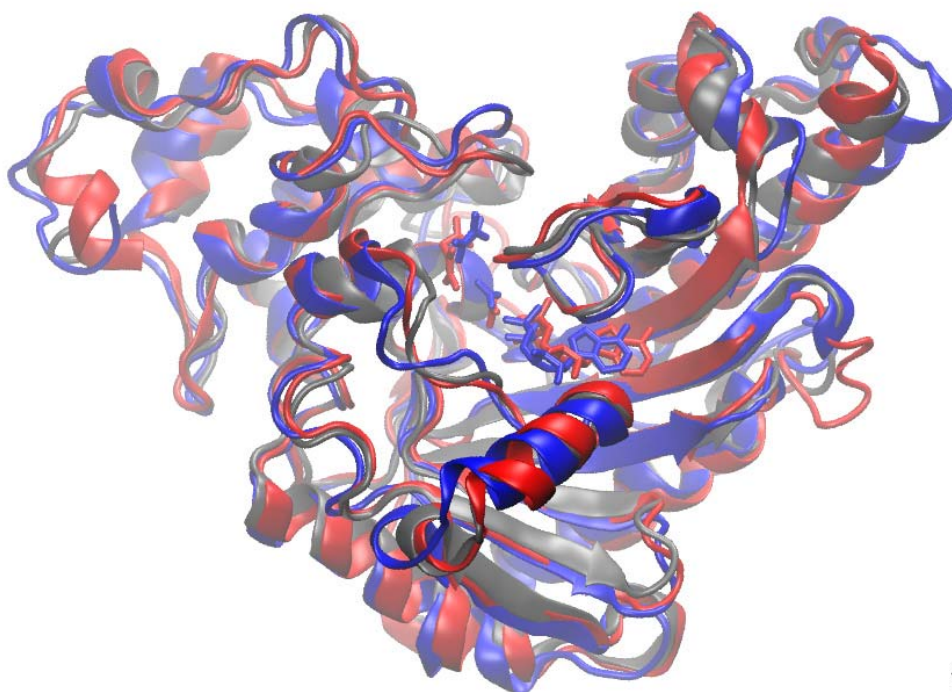

10ns

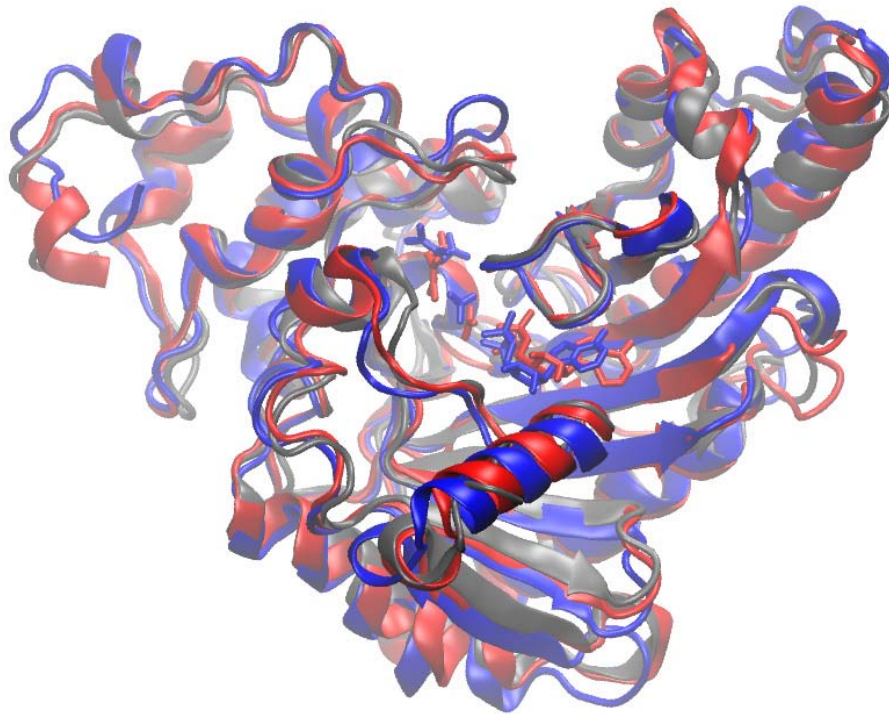

12ns

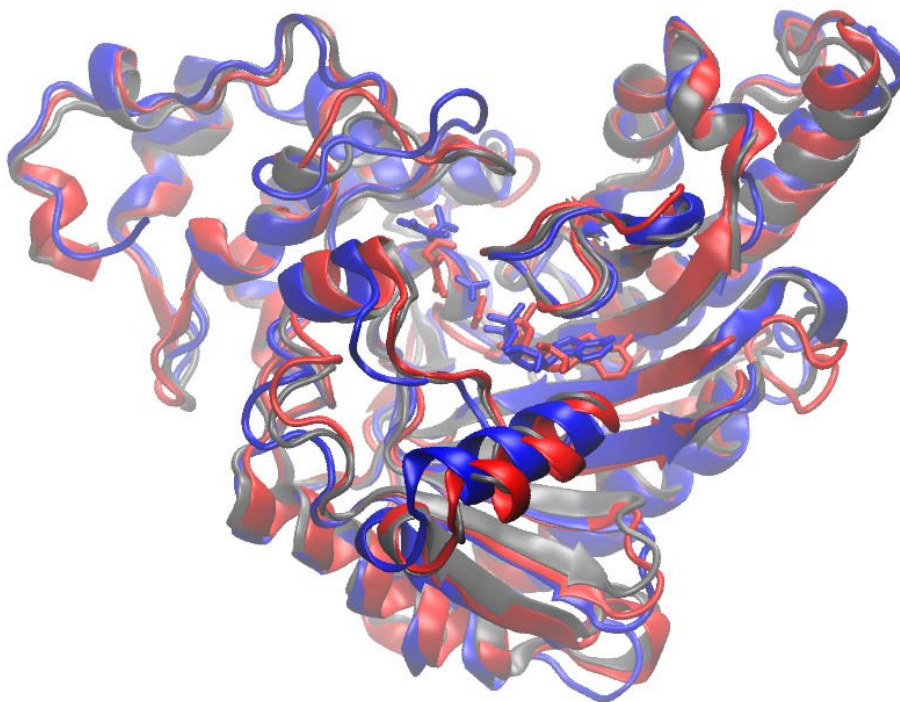

14ns
